# Supplementary material for: Preparation of composite soybean straw-based materials by LDHs modifying as a solid sorbent for removal of Pb(ii) from water samples
Source: publisher site journal article supplement (doi:10.1515/chem-2021-0058), 2021-01-01
Supplement: Supplementary file 1 [file chem-2021-0058_sm.pdf]

# Supplementary material

## 1 Preparation of B/LDHs nanocomposites

In the first-step, the powder of soybean straw (1.0 g), Mg(OH)<sub>2</sub> (3.48 g or 0.06 mol) and Al(OH)<sub>3</sub> (1.56 g or 0.01 mol) with a Mg/Al molar ratio of 3:1 were milled for 1 h under ambient conditions in air using a planetary ball mill (QM3STC, Nanjing Nanda Instrument Plant, China) with four stainless-steel mill pots (500 mL inner volume each) and 10 mm diameter steel-balls. The mill speed was constant at 480 rpm with a ball/mixture mass ratio of approximately 49. In the second-step, the milled mixture of soybean straw, Mg(OH)<sub>2</sub> and Al(OH)<sub>3</sub> was placed in a 100 mL Teflon-lined

stainless-steel autoclave with 80 mL H<sub>2</sub>O. After the vessel had been sealed and shaken thoroughly, it was placed in an oven under static conditions and treated hydrothermally at 120°C for 24 h. The resulting dispersion was centrifuged, and the solid precipitate was washed with water and dried at 60°C, yielding the B/LDHs nanocomposite sample. This sample was abbreviated as 10%-B/LDHs.

The pseudo-second order kinetic equation can be expressed as:

$$t/\Gamma_t = 1/(k_2 \Gamma_e^2) + t/\Gamma_e,$$

where  $\Gamma_t$  is the sorption amount at time  $t$ ,  $k_2$  is the rate constant of pseudo-second-order kinetics, and  $\Gamma_e$  is the equilibrium sorption amount.

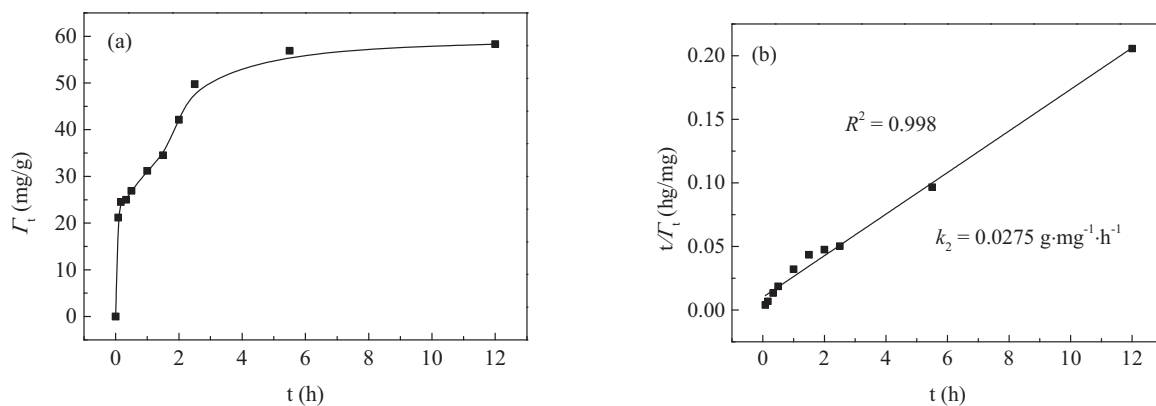

**Figure S1:** (a) Kinetic profiles and (b) pseudo-second-order kinetic model fits of Pb(II) ( $C_0 = 100 \text{ mg/L}$ , pH 6.0) sorption on the 50%-B/LDHs sample at  $C_s = 1 \text{ g/L}$  and  $25^\circ\text{C}$ .

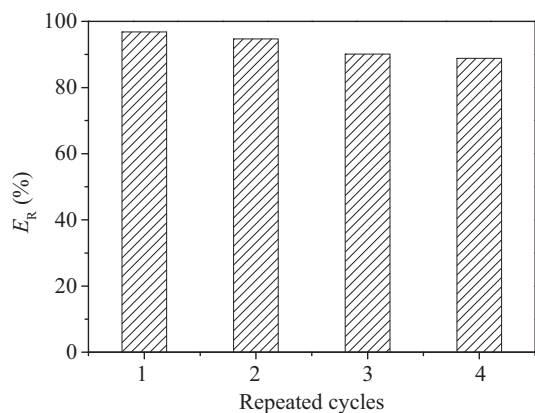

**Figure S2:** Removal efficiencies of 50%-B/LDHs composites for Pb(II) in different cycles.  $C_0 = 50$  mg/L, pH = 6.0,  $C_s = 1.0$  g/L, 25 °C and  $C_{NaNO_3} = 0.010$  M.

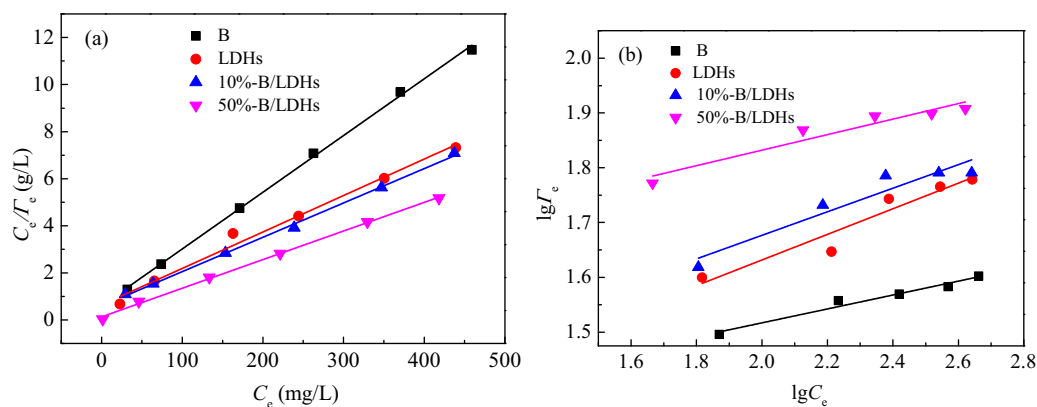

**Figure S3:** Linear correlation plots of (a) Langmuir and (b) Freundlich isotherms for Pb(II) on B, LDHs and B/LDHs samples.

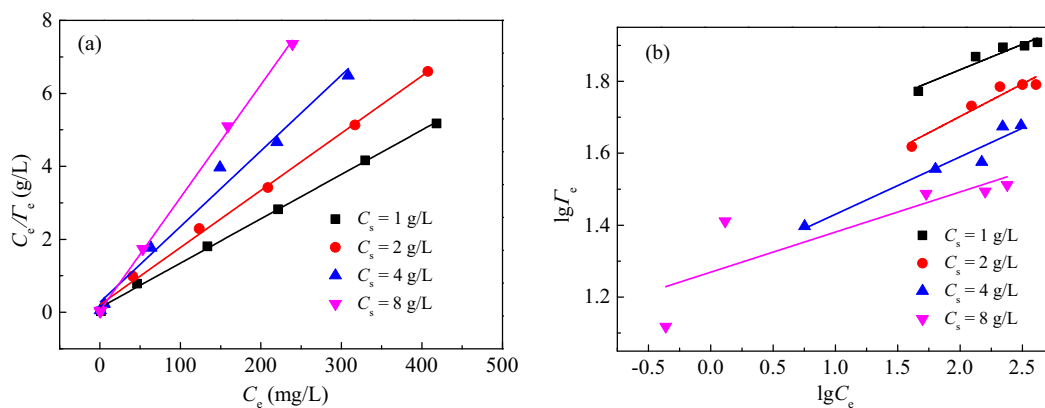

**Figure S4:** Linear correlation plots of (a) Langmuir and (b) Freundlich isotherms for Pb(II) sorption on 50%-B/LDHs at different sorbent dosages.

Table S1: Linear fitted model parameters for Pb(II) sorption on B, LDHs and B/LDHs samples

| Sample     | Langmuir isotherm |                       |       | Freundlich isotherm              |       |       |
|------------|-------------------|-----------------------|-------|----------------------------------|-------|-------|
|            | $\Gamma_m$ (mg/g) | $K_L$ (L/mg)          | $R^2$ | $K_F$ ( $L^{n_f} mg^{1-n_f}/g$ ) | $n_f$ | $R^2$ |
| B          | 41.5              | $3.99 \times 10^{-2}$ | 0.999 | 18.3                             | 0.127 | 0.963 |
| LDHs       | 64.6              | $2.43 \times 10^{-2}$ | 0.985 | 14.6                             | 0.234 | 0.905 |
| 10%-B/LDHs | 68.5              | $2.47 \times 10^{-2}$ | 0.998 | 17.7                             | 0.215 | 0.889 |
| 50%-B/LDHs | 82.2              | $9.34 \times 10^{-2}$ | 0.998 | 35.4                             | 0.142 | 0.903 |

Table S2: Linear-fit model parameters for Pb(II) sorption on 50%-B/LDHs at different  $C_s$

| $C_s$ (g/L) | Langmuir isotherm |              |       | Freundlich isotherm              |       |       |
|-------------|-------------------|--------------|-------|----------------------------------|-------|-------|
|             | $\Gamma_m$ (mg/g) | $K_L$ (L/mg) | $R^2$ | $K_F$ ( $L^{n_f} mg^{1-n_f}/g$ ) | $n_f$ | $R^2$ |
| 1.00        | 82.0              | 0.0938       | 0.998 | 35.4                             | 0.142 | 0.903 |
| 2.00        | 63.7              | 0.0755       | 0.997 | 21.9                             | 0.181 | 0.910 |
| 4.00        | 48.1              | 0.0759       | 0.980 | 18.6                             | 0.160 | 0.929 |
| 8.00        | 32.3              | 0.729        | 0.999 | 18.6                             | 0.111 | 0.626 |
